# Supplementary material for: In situ determination of the interplay of the structure and domain under a subcoercive field in BiScO3–PbTiO3
Source: Royal Society of Chemistry journal article supplement (doi:10.1039/d1qi00670c), 2021-01-01
Supplement: d1qi00670c1.pdf [file d1qi00670c1.pdf]

## Supporting Information:

### In situ determination on the interplay of structure and domain under subcoercive field in BiScO<sub>3</sub>-PbTiO<sub>3</sub>

Longlong Fan,<sup>a,†\*</sup> Linxing Zhang,<sup>c</sup> Hui Liu,<sup>b</sup> Yu-sheng Chen,<sup>†</sup> Yang Ren,<sup>d</sup> Xianran Xing,<sup>e</sup> Jun Chen<sup>b, e</sup>

<sup>a</sup> College of Physics and Materials Science, Tianjin Normal University, Tianjin 300387, China

<sup>b</sup> School of Mathematics and Physics, University of Science and Technology Beijing, Beijing 100083, China

<sup>c</sup> Institute for Advanced Materials and Technology, University of Science and Technology Beijing, Beijing 100083, China

<sup>d</sup> X-Ray Science Division, Advanced Photon Source, Argonne National Laboratory, Argonne, Illinois 60439, USA

<sup>e</sup> Beijing Advanced Innovation Center for Materials Genome Engineering, Institute of Solid State Chemistry, University of Science and Technology Beijing, Beijing 100083, China

<sup>†</sup> NSF's ChemMatCARS Beamline@APS, The University of Chicago, Argonne, IL, 60439, USA

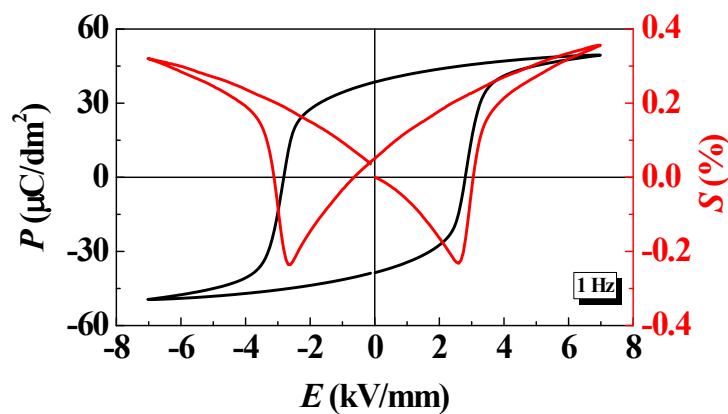

FIG. S1. Electric-field-induced strain curve (S-E) and ferroelectric hysteresis loop (P-E) of 0.365BS-0.635PT ceramics measured at 1 Hz at room temperature.

\* Corresponding authors. Email: longl.fan@gmail.com

Table S1. Structural parameters of tetragonal (P4mm) and monoclinic (Cm) phase in 0.365BS-0.635PT at electric fields of 2.5 kV/mm. In consideration of the use of high-energy X-ray photons, the anisotropic displacement parameters were merely refined for the heavy element of Pb/Bi.

| Electric Field                    | Tetragonal   | Monoclinic    |
|-----------------------------------|--------------|---------------|
| $a$ (Å)                           | 3.99534 (7)  | 5.72102(26)   |
| $b$ (Å)                           |              | 5.70761(29)   |
| $c$ (Å)                           | 4.08823(7)   | 4.02297(36)   |
| $\beta$ (°)                       |              | 89.63550(628) |
| $U_{11,22}$ -Pb (Å <sup>2</sup> ) | 0.03120(4)   | /             |
| $U_{33}$ -Pb (Å <sup>2</sup> )    | 0.01200(1)   | /             |
| $x$ -Ti/Sc                        | 0            | 0.458990      |
| $y$ -Ti/Sc                        | 0            | 0             |
| $z$ -Ti/Sc                        | 0.548700(14) | 0.505410      |
| $x$ -O1                           | 0.5          | 0.379910      |
| $y$ -O1                           | 0.5          | 0             |
| $z$ -O1                           | 0.084500(77) | 0.025330      |
| $x$ -O2                           | 0.5          | 0.179350      |
| $y$ -O2                           | 0            | 0.263160      |
| $z$ -O2                           | 0.619400(54) | 0.507840      |
| Phase fraction(%)                 | 54.30(0.56)  | 45.70(0.50)   |
| Bragg R-factor                    | 3.29         | 3.638         |
| $R_p$                             |              | 7.32          |
| $R_{wp}$                          |              | 6.75          |
| $\chi^2$                          |              | 11.6          |
